# Supplementary figures and images for: Thione complexes of Rh(i): a first comparison with the bonding and catalytic activity of related carbene and imine compounds
Source: Royal Society of Chemistry journal article supplement (doi:10.1039/b414040k), 2004-11-26

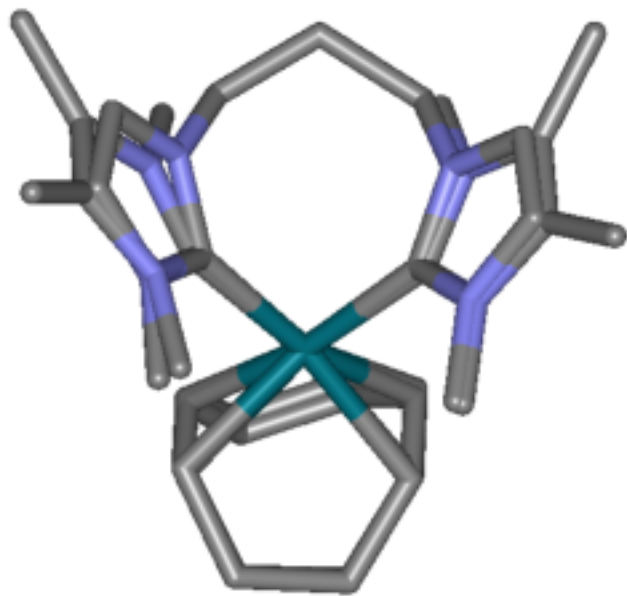

Supplement: b414040k.pdf [file b414040k.pdf]
